# Supplementary material
Source: PubMed Central journal article supplement (PMC10592538)
Supplement: NIHMS1909157-supplement-Supinfo.pdf [file NIHMS1909157-supplement-Supinfo.pdf]

**Supplementary Table S1. Characteristics of ARNI Initiators vs ACE Inhibitors/ARB Initiators for Heart Failure with Reduced Ejection, Replacing Frailty (binary) with Frailty Index**

| Characteristics                                           | Initiation of ARNI (vs ACE Inhibitor or ARB) <sup>a</sup> |                      |                   |
|-----------------------------------------------------------|-----------------------------------------------------------|----------------------|-------------------|
|                                                           | ARNI                                                      | ACE Inhibitor or ARB | OR (95% CI)       |
| Sample size, n                                            | 4,547                                                     | 33,868               |                   |
| Age category, %                                           |                                                           |                      |                   |
| 65 to <75 years old                                       | 43.5                                                      | 44.5                 | Reference         |
| 75 to <85 years old                                       | 43.2                                                      | 39.9                 | 1.07 (1.00, 1.15) |
| ≥85 years old                                             | 13.3                                                      | 15.7                 | 0.88 (0.79, 0.98) |
| Male, %                                                   | 79.5                                                      | 75.8                 | 1.23 (1.13, 1.34) |
| Race, %                                                   |                                                           |                      |                   |
| White                                                     | 82.5                                                      | 80.9                 | Reference         |
| Black                                                     | 11.4                                                      | 12.7                 | 0.97 (0.87, 1.08) |
| Hispanic/Asian/Other/Unknown                              | 6.1                                                       | 6.5                  | 1.00 (0.87, 1.15) |
| Dual eligibility, %                                       | 17.4                                                      | 23.8                 | 0.78 (0.71, 0.85) |
| Gagne combined comorbidity index (per 1 point), mean (SD) | 7.2 (3.3)                                                 | 7.3 (3.5)            | 0.98 (0.97, 0.99) |
| Frailty Index (per 0.1 point), mean (SD)                  | 0.21 (0.05)                                               | 0.23 (0.06)          | 0.71 (0.66, 0.78) |
| Comorbidities, %                                          |                                                           |                      |                   |
| Alzheimer's disease or dementia                           | 20.8                                                      | 25.4                 | 0.95 (0.87, 1.04) |
| Acute myocardial infarction                               | 27.2                                                      | 29.0                 | 0.99 (0.92, 1.07) |
| Anemia                                                    | 80.5                                                      | 80.3                 | 1.10 (1.01, 1.2)  |
| Atrial fibrillation                                       | 64.6                                                      | 60.4                 | 1.07 (1.00, 1.14) |
| Cancer                                                    | 19.8                                                      | 20.3                 | 0.99 (0.91, 1.07) |
| Chronic kidney disease                                    | 78.7                                                      | 76.2                 | 1.12 (1.03, 1.23) |
| Chronic obstructive pulmonary disease                     | 58.4                                                      | 58.0                 | 1.10 (1.03, 1.18) |
| Depression                                                | 42.4                                                      | 44.5                 | 1.06 (0.98, 1.13) |
| Diabetes                                                  | 66.7                                                      | 68.5                 | 0.95 (0.88, 1.02) |
| Hip or pelvic fracture                                    | 3.8                                                       | 5.1                  | 0.86 (0.73, 1.02) |
| Hypertension                                              | 98.0                                                      | 98.3                 | 0.85 (0.66, 1.08) |
| Osteoporosis                                              | 13.6                                                      | 15.5                 | 1.02 (0.92, 1.13) |
| Rheumatoid arthritis or osteoarthritis                    | 69.3                                                      | 68.3                 | 1.09 (1.01, 1.18) |
| Stroke or Transient Ischemic Attack                       | 27.1                                                      | 30.3                 | 0.97 (0.9, 1.05)  |

|                                           |      |      |                   |
|-------------------------------------------|------|------|-------------------|
| Cardiovascular care, %                    |      |      |                   |
| Cardiology visit within 30 days           | 72.5 | 68.2 | 1.24 (1.15, 1.33) |
| HF hospitalization $\geq 2$ in prior year | 15.8 | 14.3 | 1.44 (1.3, 1.6)   |
| HF hospitalization within 30 days         | 10.1 | 12.4 | 0.62 (0.55, 0.69) |
| Other heart failure medications, %        |      |      |                   |
| Mineralocorticoid receptor antagonists    | 43.1 | 29.8 | 1.68 (1.57, 1.79) |
| Beta-blockers                             | 88.9 | 87.7 | 1.03 (0.93, 1.14) |
| Hydralazine                               | 12.5 | 12.1 | 0.94 (0.84, 1.05) |
| Isosorbide dinitrate                      | 5.7  | 4.4  | 1.37 (1.17, 1.6)  |
| Loop diuretics                            | 82.3 | 74.4 | 1.51 (1.38, 1.65) |

---

Abbreviations: ACE, angiotensin converting enzyme; ARB, angiotensin receptor blocker; ARNI, angiotensin receptor neprilysin inhibitor; CI, confidence interval; HF, heart failure; OR, odds ratio; SD, standard deviation.

<sup>a</sup> Initiators were defined as beneficiaries who filled the prescription of ARNI vs ACE inhibitors or ARB without prior fills of any drug in ARNI, ACE inhibitor, or ARB classes in the previous year

**Supplementary Table S2. Trend of Heart Failure Medications in Patients with Heart Failure with Reduced Ejection Fraction, 2015 to 2019, by Sex**

| Medications                                                   | 2015  | 2016  | 2017  | 2018  | 2019  | P-value for yearly trend <sup>b</sup> | P for yearly trend by sex <sup>b</sup> |
|---------------------------------------------------------------|-------|-------|-------|-------|-------|---------------------------------------|----------------------------------------|
| <b>ARNI</b>                                                   |       |       |       |       |       |                                       |                                        |
| Male                                                          | 0.4%  | 3.7%  | 8.3%  | 12.1% | 15.8% | <.0001                                | 0.364                                  |
| Female                                                        | 0.3%  | 3.3%  | 7.3%  | 10.6% | 13.8% | <.0001                                |                                        |
| <b>ACE inhibitors</b>                                         |       |       |       |       |       |                                       |                                        |
| Male                                                          | 55.4% | 53.5% | 49.6% | 46.2% | 43.1% | <.0001                                | 0.233                                  |
| Female                                                        | 59.2% | 56.5% | 52.4% | 48.8% | 46.0% | <.0001                                |                                        |
| <b>ARB</b>                                                    |       |       |       |       |       |                                       |                                        |
| Male                                                          | 22.4% | 23.4% | 23.0% | 23.1% | 22.2% | <.0001                                | <.0001                                 |
| Female                                                        | 24.2% | 25.7% | 26.0% | 26.0% | 25.0% | 0.677                                 |                                        |
| <b>MRA</b>                                                    |       |       |       |       |       |                                       |                                        |
| Male                                                          | 26.0% | 28.7% | 29.9% | 30.2% | 31.0% | <.0001                                | <.0001                                 |
| Female                                                        | 34.8% | 37.2% | 38.1% | 38.7% | 39.5% | <.0001                                |                                        |
| <b>Evidence-based beta-blockers<sup>a</sup></b>               |       |       |       |       |       |                                       |                                        |
| Male                                                          | 84.8% | 86.3% | 87.1% | 87.3% | 87.1% | <.0001                                | 0.423                                  |
| Female                                                        | 89.1% | 90.2% | 90.7% | 90.5% | 90.7% | <.0001                                |                                        |
| <b>Hydralazine + Isosorbide dinitrate</b>                     |       |       |       |       |       |                                       |                                        |
| Male                                                          | 1.5%  | 1.7%  | 1.9%  | 1.8%  | 1.7%  | 0.001                                 | 0.123                                  |
| Female                                                        | 1.9%  | 2.2%  | 2.3%  | 2.1%  | 2.0%  | <.0001                                |                                        |
| <b>Loop diuretics</b>                                         |       |       |       |       |       |                                       |                                        |
| Male                                                          | 63.6% | 68.3% | 68.6% | 67.9% | 66.7% | 0.003                                 | <.0001                                 |
| Female                                                        | 74.4% | 77.6% | 77.3% | 76.2% | 75.5% | <.0001                                |                                        |
| <b>All 3 of ARNI/ACE inhibitors/ARB + beta-blockers + MRA</b> |       |       |       |       |       |                                       |                                        |
| Male                                                          | 18.9% | 21.1% | 22.0% | 22.5% | 22.9% | <.0001                                | <.0001                                 |
| Female                                                        | 26.5% | 28.6% | 29.4% | 29.7% | 30.3% | <.0001                                |                                        |
| <b>2 of ARNI/ACE inhibitors/ARB + beta-blockers + MRA</b>     |       |       |       |       |       |                                       |                                        |
| Male                                                          | 53.1% | 52.8% | 52.3% | 52.1% | 51.5% | <.0001                                | 0.126                                  |
| Female                                                        | 53.4% | 52.0% | 51.5% | 50.9% | 50.2% | 0.000                                 |                                        |
| <b>1 of ARNI/ACE inhibitors/ARB + beta-blockers + MRA</b>     |       |       |       |       |       |                                       |                                        |
| Male                                                          | 22.7% | 21.6% | 21.5% | 21.1% | 21.2% | <.0001                                | 0.002                                  |
| Female                                                        | 17.2% | 16.9% | 16.5% | 16.8% | 17.1% | <.0001                                |                                        |
| <b>None of ARNI/ACE inhibitors/ARB + beta-blockers + MRA</b>  |       |       |       |       |       |                                       |                                        |
| Male                                                          | 5.3%  | 4.6%  | 4.3%  | 4.3%  | 4.4%  | <.0001                                | 0.126                                  |
| Female                                                        | 2.9%  | 2.5%  | 2.6%  | 2.6%  | 2.5%  | <.0001                                |                                        |

Abbreviations: ACE, angiotensin converting enzyme; ARB, angiotensin receptor blockers; ARNI, angiotensin receptor neprilysin inhibitor; MRA, mineralocorticoid receptor antagonists.

<sup>a</sup> Evidence-based beta-blockers include carvedilol, metoprolol succinate, and bisoprolol.

<sup>b</sup> The receipt of a heart failure medication class or GDMT was modeled as a function of year (continuous variable), sex, and their interaction term, adjusting for age, race, dual eligibility, frailty, Alzheimer's disease and related dementias, anemia, atrial fibrillation, cancer, chronic kidney disease, chronic obstructive pulmonary disease, depression, diabetes, hip or pelvic fracture, hypertension, myocardial infarction, osteoporosis, rheumatoid arthritis or osteoarthritis, and stroke or transient ischemic attack, Gagne combined comorbidity index, cardiology visit within the past 30 days,  $\geq 2$  heart failure hospitalizations within the past year, and heart failure hospitalization within the past 30 days, using generalized estimating equation logistic regression with exchangeable correlation structure to account for correlation within the same individuals.

**Supplementary Table S3. Trend of Heart Failure Medications in Patients with Heart Failure with Reduced Ejection Fraction, 2015 to 2019, by Race**

| Medications                                                   | 2015  | 2016  | 2017  | 2018  | 2019  | P-value for yearly trend <sup>b</sup> | P for yearly trend by race <sup>b</sup> |
|---------------------------------------------------------------|-------|-------|-------|-------|-------|---------------------------------------|-----------------------------------------|
| <b>ARNI</b>                                                   |       |       |       |       |       |                                       |                                         |
| White                                                         | 0.4%  | 3.6%  | 8.0%  | 11.5% | 15.0% | <.0001                                | 0.186                                   |
| Black                                                         | 0.4%  | 3.7%  | 8.0%  | 12.5% | 16.3% | <.0001                                |                                         |
| Other                                                         | 0.5%  | 4.0%  | 8.6%  | 13.6% | 17.4% | <.0001                                |                                         |
| <b>ACE inhibitors</b>                                         |       |       |       |       |       |                                       |                                         |
| White                                                         | 56.5% | 54.5% | 50.8% | 47.4% | 44.3% | <.0001                                | <.0001                                  |
| Black                                                         | 57.3% | 54.3% | 49.1% | 44.6% | 41.2% | <.0001                                |                                         |
| Other                                                         | 52.3% | 50.8% | 46.4% | 43.9% | 41.8% | <.0001                                |                                         |
| <b>ARB</b>                                                    |       |       |       |       |       |                                       |                                         |
| White                                                         | 22.2% | 23.3% | 23.1% | 23.2% | 22.4% | <.0001                                | <.0001                                  |
| Black                                                         | 25.1% | 26.1% | 25.8% | 26.0% | 25.1% | 0.000                                 |                                         |
| Other                                                         | 30.2% | 31.8% | 30.7% | 29.3% | 26.9% | <.0001                                |                                         |
| <b>MRA</b>                                                    |       |       |       |       |       |                                       |                                         |
| White                                                         | 28.2% | 30.9% | 32.1% | 32.4% | 33.1% | <.0001                                | <.0001                                  |
| Black                                                         | 30.8% | 32.9% | 33.5% | 34.6% | 35.1% | <.0001                                |                                         |
| Other                                                         | 26.1% | 29.3% | 30.1% | 29.9% | 30.9% | <.0001                                |                                         |
| <b>Evidence-based beta-blockers<sup>a</sup></b>               |       |       |       |       |       |                                       |                                         |
| White                                                         | 85.7% | 87.1% | 87.9% | 88.0% | 87.9% | <.0001                                | 0.029                                   |
| Black                                                         | 88.2% | 89.2% | 89.6% | 89.6% | 89.0% | 0.041                                 |                                         |
| Other                                                         | 86.3% | 87.6% | 87.6% | 88.3% | 88.2% | 0.003                                 |                                         |
| <b>Hydralazine + Isosorbide dinitrate</b>                     |       |       |       |       |       |                                       |                                         |
| White                                                         | 0.9%  | 1.1%  | 1.1%  | 1.2%  | 1.1%  | 0.007                                 | 0.000                                   |
| Black                                                         | 7.5%  | 8.0%  | 8.5%  | 7.8%  | 7.4%  | 0.000                                 |                                         |
| Other                                                         | 1.7%  | 1.9%  | 2.1%  | 1.8%  | 1.9%  | 0.079                                 |                                         |
| <b>Loop diuretics</b>                                         |       |       |       |       |       |                                       |                                         |
| White                                                         | 66.2% | 70.7% | 70.8% | 70.1% | 68.9% | 0.522                                 | <.0001                                  |
| Black                                                         | 71.4% | 74.0% | 74.1% | 73.0% | 71.9% | 0.267                                 |                                         |
| Other                                                         | 61.9% | 66.7% | 66.4% | 65.1% | 64.5% | 0.758                                 |                                         |
| <b>All 3 of ARNI/ACE inhibitors/ARB + beta-blockers + MRA</b> |       |       |       |       |       |                                       |                                         |
| White                                                         | 20.6% | 22.8% | 23.8% | 24.2% | 24.5% | <.0001                                | <.0001                                  |
| Black                                                         | 24.6% | 25.9% | 26.3% | 27.0% | 27.3% | 0.010                                 |                                         |
| Other                                                         | 19.8% | 22.8% | 23.2% | 23.5% | 24.6% | <.0001                                |                                         |
| <b>2 of ARNI/ACE inhibitors/ARB + beta-blockers + MRA</b>     |       |       |       |       |       |                                       |                                         |
| White                                                         | 53.2% | 52.7% | 52.2% | 52.0% | 51.4% | <.0001                                | 0.097                                   |
| Black                                                         | 52.1% | 51.4% | 50.4% | 49.6% | 48.4% | <.0001                                |                                         |
| Other                                                         | 55.0% | 53.8% | 53.0% | 53.2% | 51.8% | 0.001                                 |                                         |

|                                                       |       |       |       |       |       |        |        |
|-------------------------------------------------------|-------|-------|-------|-------|-------|--------|--------|
| 1 of ARNI/ACE inhibitors/ARB + beta-blockers + MRA    |       |       |       |       |       |        |        |
| White                                                 | 21.5% | 20.5% | 20.2% | 20.0% | 20.1% | <.0001 | <.0001 |
| Black                                                 | 19.2% | 19.1% | 19.6% | 19.6% | 20.4% | 0.491  |        |
| Other                                                 | 21.0% | 19.9% | 20.1% | 19.8% | 19.9% | 0.043  |        |
| None of ARNI/ACE inhibitors/ARB + beta-blockers + MRA |       |       |       |       |       |        |        |
| White                                                 | 4.7%  | 4.1%  | 3.8%  | 3.8%  | 3.9%  | <.0001 | 0.060  |
| Black                                                 | 4.1%  | 3.6%  | 3.7%  | 3.8%  | 3.9%  | 0.038  |        |
| Other                                                 | 4.3%  | 3.6%  | 3.7%  | 3.5%  | 3.8%  | 0.019  |        |

Abbreviations: ACE, angiotensin converting enzyme; ARB, angiotensin receptor blockers; ARNI, angiotensin receptor neprilysin inhibitor; MRA, mineralocorticoid receptor antagonists.

<sup>a</sup> Evidence-based beta-blockers include carvedilol, metoprolol succinate, and bisoprolol.

<sup>b</sup> The receipt of a heart failure medication class or GDMT was modeled as a function of year (continuous variable), race, and their interaction term, adjusting for age, sex, dual eligibility, frailty, Alzheimer's disease and related dementias, anemia, atrial fibrillation, cancer, chronic kidney disease, chronic obstructive pulmonary disease, depression, diabetes, hip or pelvic fracture, hypertension, myocardial infarction, osteoporosis, rheumatoid arthritis or osteoarthritis, and stroke or transient ischemic attack, Gagne combined comorbidity index, cardiology visit within the past 30 days,  $\geq 2$  heart failure hospitalizations within the past year, and heart failure hospitalization within the past 30 days, using generalized estimating equation logistic regression with exchangeable correlation structure to account for correlation within the same individuals.

## Supplementary Figure S4. Temporal Trends of Heart Failure Medications and Guideline-Directed Medical Therapy in Medicare Beneficiaries with Heart Failure with Reduced Ejection Fraction, 2015-2019, by Sex<sup>a</sup>

### A. Use of Heart Failure Medications

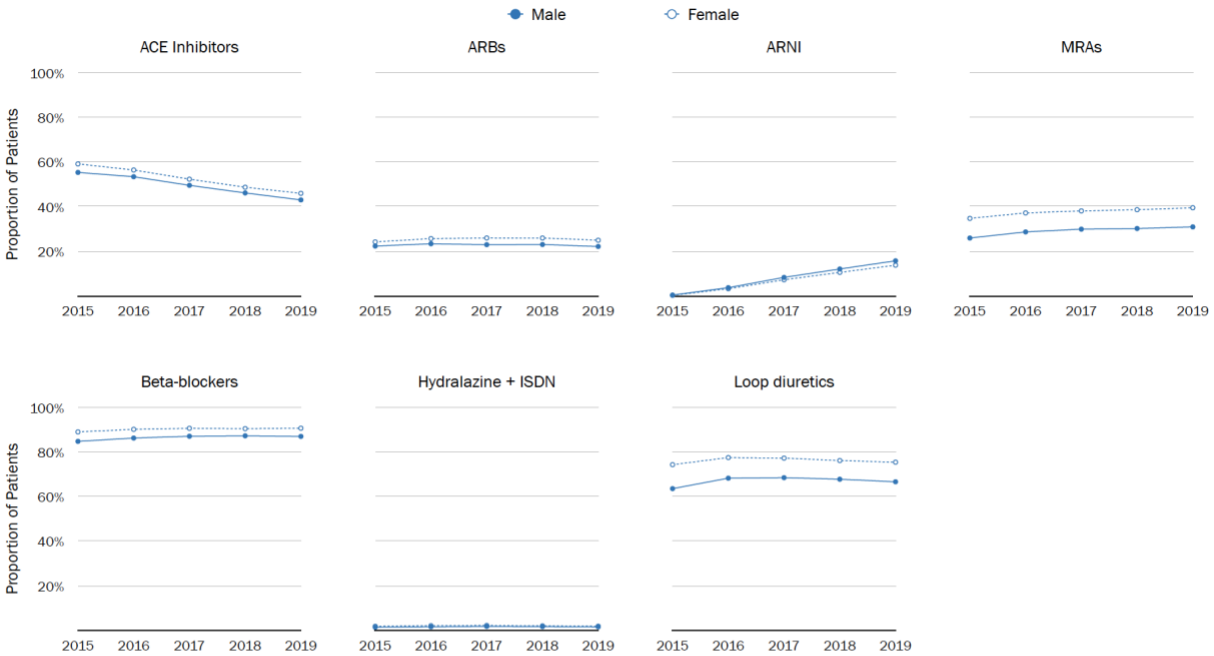

### B. Guideline-Directed Medical Therapy

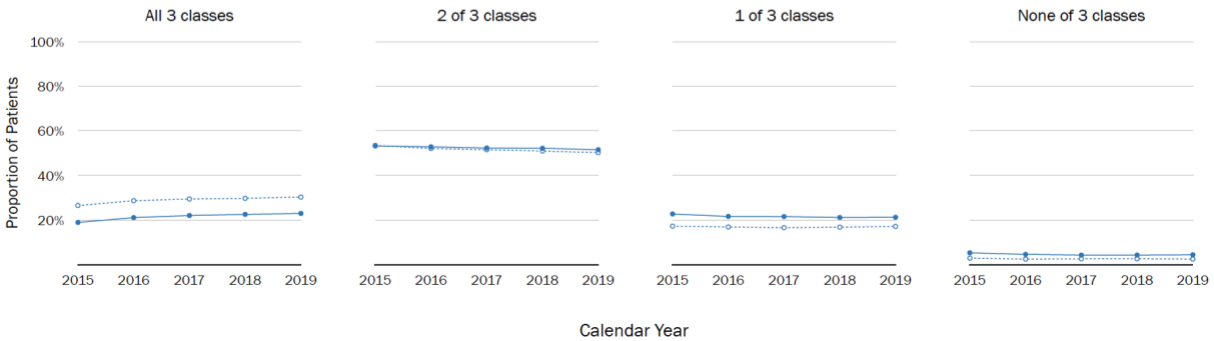

Abbreviations: ACE, angiotensin converting enzyme; ARB, angiotensin receptor blocker; ARNI, angiotensin receptor neprilysin inhibitor; ISDN, isosorbide dinitrate; MRA, mineralocorticoid receptor antagonist.

<sup>a</sup> Figure S4 shows the proportion of Medicare beneficiaries with heart failure and reduced ejection fraction receiving heart failure medications and guideline-directed medical therapy (GDMT) by sex in each year. Heart failure medication use was defined as any prescription fill in part D claims in a given calendar year for ARNI, ACE inhibitor, ARB, evidence-based beta-blockers (bisoprolol, carvedilol, or metoprolol), MRA (spironolactone and eplerenone), hydralazine and ISDN, and loop diuretics. GDMT was defined as filling of a prescription for drugs in the following 3 classes within a given year: 1) an ARNI, ACE inhibitor, or ARB; 2) a beta-blocker; or 3) a MRA.

## Supplementary Figure S5. Temporal Trends of Heart Failure Medications and Guideline-Directed Medical Therapy in Medicare Beneficiaries with Heart Failure with Reduced Ejection Fraction, 2015-2019, by Race<sup>a</sup>

### A. Use of Heart Failure Medications

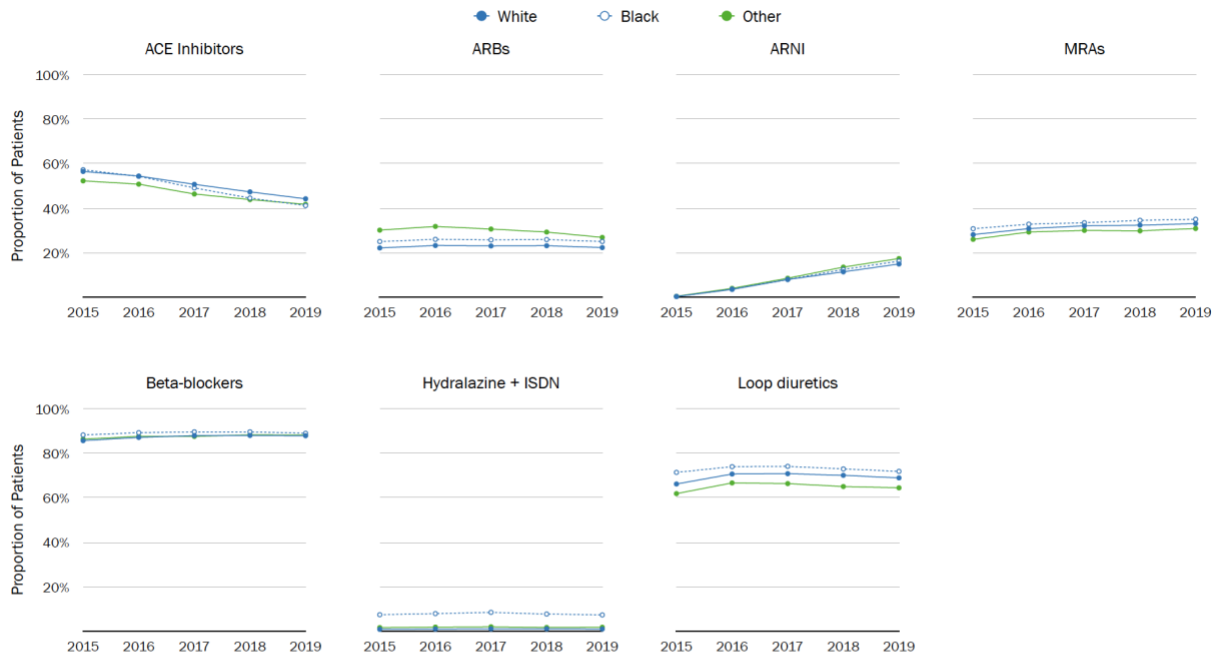

### B. Guideline-Directed Medical Therapy

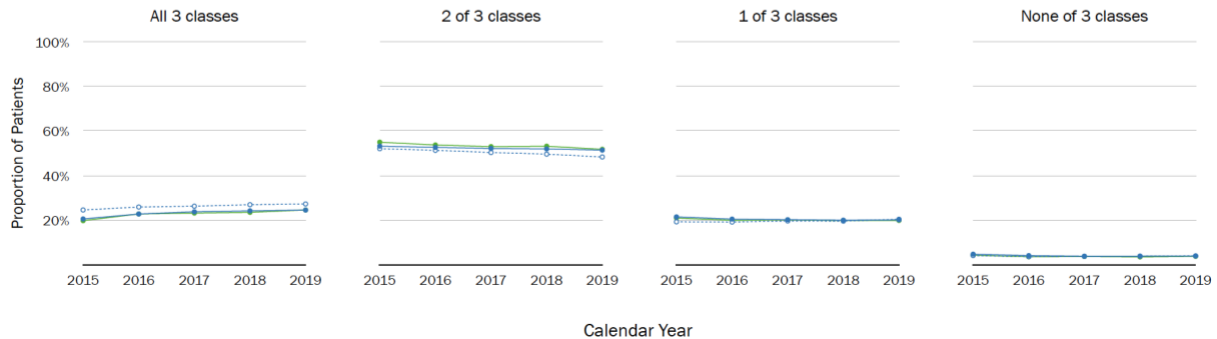

Abbreviations: ACE, angiotensin converting enzyme; ARB, angiotensin receptor blocker; ARNI, angiotensin receptor neprilysin inhibitor; ISDN, isosorbide dinitrate; MRA, mineralocorticoid receptor antagonist.

<sup>a</sup> Figure S5 shows the proportion of Medicare beneficiaries with heart failure and reduced ejection fraction receiving heart failure medications and guideline-directed medical therapy (GDMT) by race in each year. Heart failure medication use was defined as any prescription fill in part D claims in a given calendar year for ARNI, ACE inhibitor, ARB, evidence-based beta-blockers (bisoprolol, carvedilol, or metoprolol), MRA (spironolactone and eplerenone), hydralazine and ISDN, and loop diuretics. GDMT was defined as filling of a prescription for drugs in the following 3 classes within a given year: 1) an ARNI, ACE inhibitor, or ARB; 2) a beta-blocker; or 3) a MRA.



## Supplementary Figure S6. Use of Guideline-Directed Medical Therapy and Kaplan-Meier Curves of Heart Failure Hospitalization-Free and Overall Survival Over 4 Years

### A. Death or HF Hospitalization

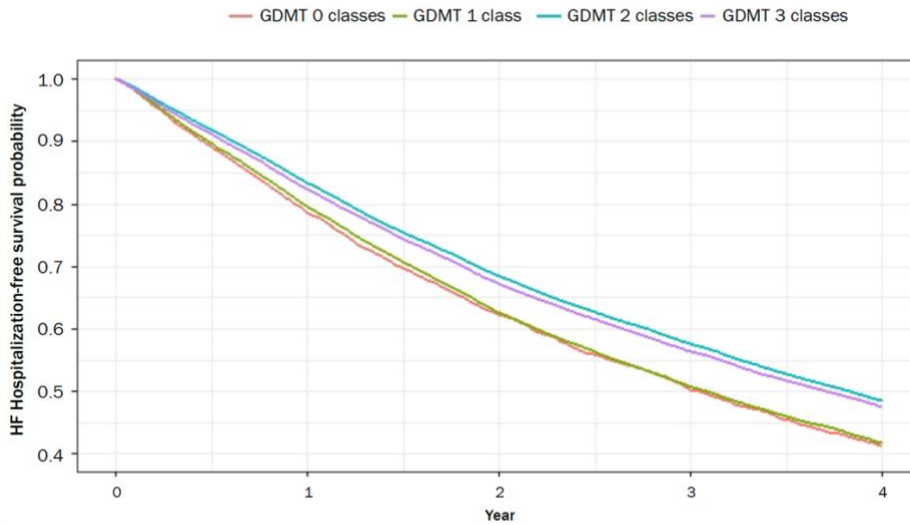

| GDMT      | 0     | 1     | 2     | 3     | 4     |
|-----------|-------|-------|-------|-------|-------|
| 0 Classes | 5970  | 4590  | 3022  | 2129  | 1567  |
| 1 Class   | 30028 | 23475 | 15908 | 11475 | 8579  |
| 2 Classes | 78302 | 64108 | 45960 | 34529 | 26529 |
| 3 Classes | 32699 | 26399 | 19054 | 14415 | 11144 |

### B. Death

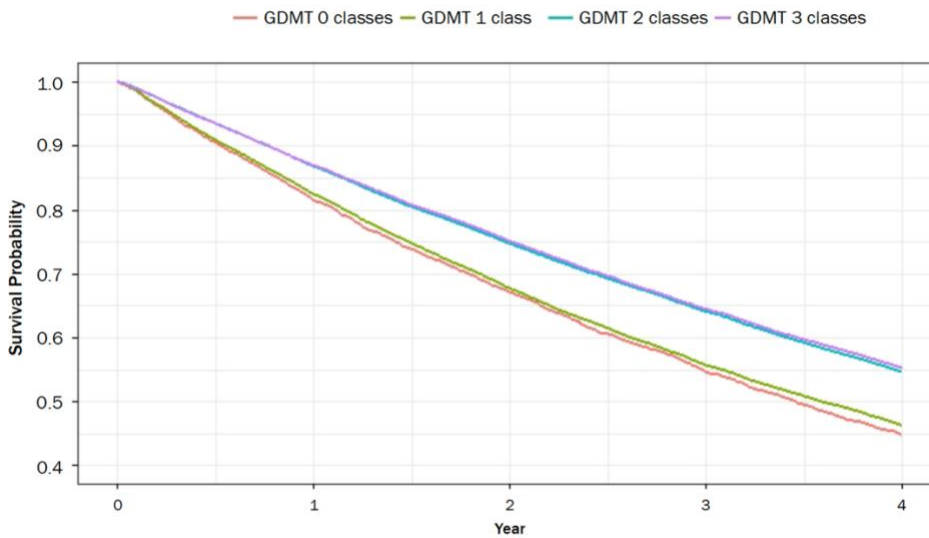

| GDMT      | 0     | 1     | 2     | 3     | 4     |
|-----------|-------|-------|-------|-------|-------|
| 0 Classes | 5970  | 4766  | 3282  | 2332  | 1715  |
| 1 Class   | 30028 | 24344 | 17312 | 12684 | 9599  |
| 2 Classes | 78302 | 66784 | 50474 | 38729 | 30185 |
| 3 Classes | 32699 | 27895 | 21473 | 16645 | 13095 |

Abbreviations: GDMT, guideline-directed medical therapy; HF, heart failure.

Cox proportional hazards regression was used to estimate the hazard ratio and 95% confidence interval for the clinical outcomes associated with the number of GDMT class received. We adjusted for age, sex, race, dual eligibility, Alzheimer's disease and related dementias, anemia, atrial fibrillation, cancer, chronic kidney disease, chronic obstructive pulmonary disease,

depression, diabetes, hip or pelvic fracture, hypertension, myocardial infarction, osteoporosis, rheumatoid arthritis or osteoarthritis, and stroke or transient ischemic attack, Gagne combined comorbidity index, frailty, cardiology visit within the past 30 days,  $\geq 2$  heart failure hospitalizations within the past year, and heart failure hospitalization within the past 30 days.
